# Supplementary material for: Decreased gut microbiota diversity, delayed Bacteroidetes colonisation and reduced Th1 responses in infants delivered by Caesarean section
Source: HighWire-hosted journal article supplement (doi:10.1136/gutjnl-2012-303249), 2013-08-07
Supplement: gutjnl-2012-303249supp_figure1.pdf [file gutjnl-2012-303249supp_figure1.pdf]

**Supplementary appendix 4 The results of the probabilistic sensitivity analyses**

The probabilistic sensitivity analyses (PSA) were carried by varying all parameters simultaneously, except for specific parameters such as ramucirumab cost (10mg/kg per unit) and erlotinib cost (2100 mg per unit), etc, therefore, to test the influence of uncertainty in the model parameters on the ICERs.

**Table 4** The results of the probabilistic sensitivity analyses

| Parameter                       | Variable range   | ICER for                                                |            |
|---------------------------------|------------------|---------------------------------------------------------|------------|
|                                 |                  | Ramucirumab-erlotinib vs Placebo-erlotinib<br>Low value | High value |
| <b>Costs (\$)</b>               |                  |                                                         |            |
| Ramucirumab(10mg/kg per unit)   | 43.5 to 100.5    | 65226.85                                                | 128302.29  |
| Erlotinib(2100 mg per unit)     | 115.6 to 385.3   | 128302.29                                               | 131554.68  |
| Routine follow-up per unit      | 27.8 to 46.3     | 128179.30                                               | 128424.75  |
| Subsequent therapy per unit     | 462.0 to 648.9   | 127029.19                                               | 129497.47  |
| Best supportive care per unit   | 105.8 to 529.1   | 124094.94                                               | 139035.99  |
| Terminal phase per unit         | 1527.9 to 1977.7 | 128291.51                                               | 128312.98  |
| Hypertension per event          | 11.6 to 14.2     | 128302.03                                               | 128302.55  |
| Diarrhea per event              | 4.14 to 6.22     | 128302.24                                               | 128302.34  |
| <b>Risk for SAEs</b>            |                  |                                                         |            |
| Diarrhea in ramucirumab arm     | 0.058 to 0.086   | 128213.85                                               | 128385.95  |
| Diarrhea in placebo arm         | 0.1 to 0.16      | 128060.34                                               | 128159.21  |
| Hypertension in ramucirumab arm | 0.188 to 0.282   | 128125.48                                               | 128477.39  |
| Hypertension in placebo arm     | 0.042 to 0.064   | 128291.07                                               | 128314.22  |
| Rash in ramucirumab arm         | 0.0070 to 0.011  | 128284.95                                               | 128318.80  |
| Rash in placebo arm             | 0.018 to 0.026   | 128293.83                                               | 128311.76  |
| Vomiting in ramucirumab arm     | 0.0070 to 0.011  | 128280.39                                               | 128323.14  |
| Vomiting in placebo arm         | 0.0030 to 0.0050 | 128300.72                                               | 128306.38  |
| Fatigue in ramucirumab arm      | 0.011 to 0.017   | 128288.76                                               | 128323.52  |
| Neutropenia in ramucirumab arm  | 0.022 to 0.032   | 128213.38                                               | 128386.16  |
| Neutropenia in placebo arm      | 0.0070 to 0.011  | 128292.63                                               | 128310.93  |
| <b>Health utility values</b>    |                  |                                                         |            |
| PFS state                       | 0.652 to 0.978   | 122801.27                                               | 134319.28  |

---

|                           |                |           |           |
|---------------------------|----------------|-----------|-----------|
| PS state                  | 0.257 to 0.385 | 114621.00 | 145692.29 |
| PFS plus diarrhea         | 0.597 to 0.895 | 127394.86 | 129222.74 |
| PFS plus hypertension     | 0.618 to 0.928 | 125320.08 | 131429.90 |
| PFS plus rash             | 0.576 to 0.846 | 128266.81 | 128342.87 |
| PFS plus nausea/vomiting  | 0.556 to 0.834 | 128204.91 | 128399.83 |
| PFS plus fatigue          | 0.6 to 0.9     | 128124.41 | 128480.67 |
| PFS plus neutropenia      | 0.497 to 0.745 | 128029.05 | 128576.71 |
| <b>Discount rate(%)</b>   | 0.0 to 0.08    | 108160.85 | 159964.08 |
| <b>Patient weight(kg)</b> | 52.0 to 78.0   | 106064.97 | 150539.62 |

---
